# Supplementary material for: Pyrrolizidine Alkaloids—Pros and Cons for Pharmaceutical and Medical Applications
Source: MDPI journal article supplement (doi:10.3390/ijms242316972), 2023-11-30
Supplement: s1 [file s1]

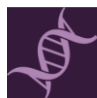

Review

# Pyrrolizidine Alkaloids –Pros and Cons for Pharmaceutical and Medicinal Applications

Kavindi Jayawickreme<sup>1,†</sup>, Dawid Świstak<sup>1,†</sup>, Ewa Ozimek<sup>2</sup>, Emilia Reszczyńska<sup>3,4</sup>, Anna Rysiak<sup>5</sup>, Anna Makuch-Kocka<sup>6</sup> and Agnieszka Hanaka<sup>4\*</sup>

<sup>1</sup> Student Scientific Club of Phytochemists, Institute of Biological Sciences, Faculty of Biology and Biotechnology, Maria Curie-Skłodowska University, Akademicka St. 19, 20-033 Lublin, Poland

<sup>2</sup> Department of Industrial and Environmental Microbiology, Institute of Biological Sciences, Faculty of Biology and Biotechnology, Maria Curie-Skłodowska University, Akademicka St. 19, 20-033 Lublin, Poland

<sup>3</sup> Department of Biochemistry and Molecular Biology, Medical University of Lublin, Chodźki St. 1, 20-093 Lublin, Poland

<sup>4</sup> Department of Plant Physiology and Biophysics, Institute of Biological Sciences, Faculty of Biology and Biotechnology, Maria Curie-Skłodowska University, Akademicka St. 19, 20-033 Lublin, Poland

<sup>5</sup> Department of Botany, Mycology, and Ecology, Institute of Biological Sciences, Faculty of Biology and Biotechnology, Maria Curie-Skłodowska University, Akademicka St. 19, 20-033 Lublin, Poland

<sup>6</sup> Department of Pharmacology, Medical University of Lublin, Radziwiłłowska St. 11, 20-080, Lublin, Poland

\* Correspondence: agnieszka.hanaka@mail.umcs.pl

† These authors contributed equally to this work.

**Table S1.** HPLC/UHPLC protocols of PAs detection. Abbreviations: HPLC/UHPLC - high-performance liquid chromatography/ ultra-high-performance liquid chromatography; PCX cartridge - a cation exchanger with mixed mode sorbent characteristics; GCB - graphitised carbon black; PSA - primary secondary amine; C18 - octadecylsilane.

| Name of PAs                                                                                                                           | PAs-producing plants                                                                                                                                                                                                            | Column                                                | Extraction condition                                                                                                                                                                                                                                                                          | Chromatography condition HPLC/UHPLC                                                                                                                                                                                                                                                                                                                                                                                                                                                                                                                                                                                                                               | Ref. |
|---------------------------------------------------------------------------------------------------------------------------------------|---------------------------------------------------------------------------------------------------------------------------------------------------------------------------------------------------------------------------------|-------------------------------------------------------|-----------------------------------------------------------------------------------------------------------------------------------------------------------------------------------------------------------------------------------------------------------------------------------------------|-------------------------------------------------------------------------------------------------------------------------------------------------------------------------------------------------------------------------------------------------------------------------------------------------------------------------------------------------------------------------------------------------------------------------------------------------------------------------------------------------------------------------------------------------------------------------------------------------------------------------------------------------------------------|------|
| retrorsine;<br>senecivernine;<br>echimidine-N-oxide;<br>retrorsine-N-oxide;<br>sen-ecivernine-N-oxide;<br>concentration:<br>> 2 µg/ml | <i>Atractylodis Macrocephalae</i><br><i>Rhizoma</i> ;<br><i>Paeoniae Radix Alba</i> ;<br><i>Angelicae Sinensis Radix</i> ;<br><i>Bupleuri Radix</i> ;<br><i>Glycyrrhizae Radix</i> Et<br><i>Rhizoma Praeparata Cum</i><br>Melle | Thermo Hypersil<br>Gold C18 (100 ×<br>2.1 mm, 1.9 µm) | 1% formic acid;<br>sonication: room temp., 20 min;<br>supernatant applied to the PCX cartridge;<br>pretreated: methanol + 0.05 M sulfuric acid<br>solution (1:1, v/v);<br>rinsed: methanol + 0.05 M sulfuric acid solution;<br><br>PAs: washed with ammonia + methanol (1:3,<br>v/v) solution | <b>mobile phase A:</b> 0.05% formic acid solution<br>(containing 2.5 mM/L ammonium formate);<br><b>mobile phase B:</b> methanol + 0.05% formic acid<br>solution<br>(containing 2.5 mM/L ammonium formate);<br><b>elution</b><br><b>gradient:</b><br>95% A, 0 min–0.5 min;<br>changed with a linear gradient to:<br>90% A, 0.5 min–5 min;<br>85% A, 5 min–11 min;<br>80% A, 11 min–13 min;<br>35% A, 13 min–14 min;<br>5% A, 14 min–16.5 min;<br>keeping isocratic elution for 2.5 min;<br>95% A, 16.5 min–16.6 min, 95% A, 16.6 min–18 min;<br><b>flow rate:</b> 0.4 mL/min,<br><b>column temperature:</b> 40°C,<br><b>injection volume:</b> 2 µL in 50% methanol | [1]  |
| green tea, black<br>tea, herbal<br>infusion                                                                                           | <i>Asteraceae: Eupatorium can-</i><br><i>nabinum, Petasites hybridus,</i><br><i>Senecio vulgaris, Tussilago</i><br><i>farfara</i> );                                                                                            | Omega Polar C18<br>(2.1 × 100 mm,<br>1.6 µm;          | aqueous extracts aliquot of the aqueous<br>solution (10 ml) brought to a concentration of 1                                                                                                                                                                                                   | <b>mobile phase A:</b> H <sub>2</sub> O and<br><b>mobile phase B:</b> MeCN<br>- both containing 0.1% of formic acid;                                                                                                                                                                                                                                                                                                                                                                                                                                                                                                                                              |      |

|                                                                                                                 |                                                                                                                                                      |                                                  |                                                                                                                                                                                                                                                                                                                                                                                                                                     |                                                                                                                                                                                                                                                                                                                                                                                                                                                                                       |     |
|-----------------------------------------------------------------------------------------------------------------|------------------------------------------------------------------------------------------------------------------------------------------------------|--------------------------------------------------|-------------------------------------------------------------------------------------------------------------------------------------------------------------------------------------------------------------------------------------------------------------------------------------------------------------------------------------------------------------------------------------------------------------------------------------|---------------------------------------------------------------------------------------------------------------------------------------------------------------------------------------------------------------------------------------------------------------------------------------------------------------------------------------------------------------------------------------------------------------------------------------------------------------------------------------|-----|
| lasiocarpine;<br>retrosine;<br>senecionine;<br>monocrotaline;<br>senkirikine;<br>e.g., ~100 µg kg <sup>-1</sup> | <i>Boraginaceae: Anchusa officinalis; Borago officinalis, Echium italicum, Heliotropium europaeum, Lithospermum officinale, Symphytum officinale</i> | Phenomenex) column                               | M of MgSO <sub>4</sub> ·7H <sub>2</sub> O, 1.5 M Na <sub>2</sub> SO <sub>4</sub> , pH 9.6; centrifugated: 5 min (13,000 rpm); 2 mL of the aqueous solution extracted with 2 mL of MeCN by vortexing for 1 min; centrifuged: 5 min (13,000 rpm) to achieve the phase separation; upper organic phase (MeCN)-dry under a gentle nitrogen flow; re-dissolved in 200 µL of H <sub>2</sub> O/MeOH (7:3 v/v) for herbal infusions and tea | <b>elution gradient:</b><br>2% B, 0–1 min;<br>2–8% B, 1–5.5 min;<br>8% B, 5.5–7.5 min;<br>8–12% B, 7.5–9.5 min;<br>12–18% B, 9.5–11 min;<br>18–20% B, 11–13 min;<br>20–40% B, 13–15 min;<br>40–60% B, 15–17 min;<br>60–80% B, 17–19 min;<br>after each injection: washing (98% B, 4 min) and re-equilibration of the column (2% B, 5 min);<br><b>flow rate:</b> 0.4 mL/min,<br><b>column temperature:</b> 40 °C;<br><b>injection volume:</b> 5 µL in H <sub>2</sub> O/MeOH (7:3, v/v) | [2] |
| heliotrine;<br>europine                                                                                         | <i>Heliotropium dasycarpum</i> Ledeb.                                                                                                                | Luna Omega Polar C18 column (3 µm, 250 × 4.6 mm) | dried plant material (3 kg);<br>extraction: distilled MeOH twice (5 L, room temp.);<br>solvent: evaporated under reduced pressure to get 75 g mass;<br>methanolic extract (75 g) suspended in distilled water (500 mL);<br>extracted with hexane and ethyl acetate; achieved fractions: hexane (35 g), ethyl acetate (22 g), and residual water (16 g)                                                                              | <b>mobile phase A:</b> 0.1% formic acid in H <sub>2</sub> O;<br><b>mobile phase B:</b> acetonitrile<br>gradient: 10–100% B, 45 min;<br><b>flow rate:</b> 0.5 mL/min;<br><b>injection volume:</b> 3 µL;<br>UV detector: 190–800 nm                                                                                                                                                                                                                                                     | [3] |
| heliotrine,<br>heliotrine- <i>N</i> -oxide,<br>retrorsine,                                                      | fresh tea leaves                                                                                                                                     | HSS T3 column (2.1 × 100 mm,                     | leaves (1g);<br>10 mL of 0.1 M sulfuric acid solution;<br>vortexed: 1 min;                                                                                                                                                                                                                                                                                                                                                          | <b>mobile phase A:</b> 0.1% formic acid + 1 mM ammonium formate in methanol'                                                                                                                                                                                                                                                                                                                                                                                                          |     |

|                                                                                                                                                                                                                                                                                                      |                    |                                                                                                                                                                                                                                                                                                |                                                                                                                                                                                                                                                                                                                                                                                                          |     |
|------------------------------------------------------------------------------------------------------------------------------------------------------------------------------------------------------------------------------------------------------------------------------------------------------|--------------------|------------------------------------------------------------------------------------------------------------------------------------------------------------------------------------------------------------------------------------------------------------------------------------------------|----------------------------------------------------------------------------------------------------------------------------------------------------------------------------------------------------------------------------------------------------------------------------------------------------------------------------------------------------------------------------------------------------------|-----|
| retrorsine- <i>N</i> -oxide,<br>denecionine,<br>senecionine- <i>N</i> -<br>oxide,<br>jacobine,<br>jacobine- <i>N</i> -oxide,<br>intermedine,<br>intermedine- <i>N</i> -<br>oxide,<br>seneciphylline,<br>seneciphylline <i>N</i> -<br>oxide,<br>europine,<br>europine- <i>N</i> -oxide,<br>senkirrine | 1.8 µm,<br>Waters) | ultrasonically extracted: 15 min;<br>centrifuged: 10 min (9,390g);<br>after repetition of extraction supernatant was<br>combined;<br>2 mL aliquot of the supernatant placed with the<br>adsorbents GCB:PSA:C18 (10:20:15 mg);<br>vortexed: 1 min;<br>centrifuged: 8 min (9,390g) at room temp. | <b>mobile phase B:</b> 0.1% formic acid + 1 mM<br>ammonium formate in H <sub>2</sub> O;<br><b>elution gradient:</b><br>10% A, 0–0.25 min;<br>10–30% A, 0.25–6.0 min;<br>30–40% A, 6.0–9.0 min;<br>40–98% A, 9.0–9.01 min;<br>held for 1.9 min;<br>98–100% A 11.0–11.1 min;<br>held for 2.9 min;<br><b>flow rate:</b> 0.25 mL/min;<br><b>column temperature:</b> 40 °C;<br><b>injection volume:</b> 3 µL; | [4] |
|------------------------------------------------------------------------------------------------------------------------------------------------------------------------------------------------------------------------------------------------------------------------------------------------------|--------------------|------------------------------------------------------------------------------------------------------------------------------------------------------------------------------------------------------------------------------------------------------------------------------------------------|----------------------------------------------------------------------------------------------------------------------------------------------------------------------------------------------------------------------------------------------------------------------------------------------------------------------------------------------------------------------------------------------------------|-----|

3

4

5

6

7

8

9

**Table S2.** Overview of PA-rich family *Boraginaceae*, where: life forms per – perennial plant, ann – annual, bienn – biennial. Geographical range and life forms based on the Plants of the World online [6] herbal raw materials according to Smith and Culvenor [7], and names of plant taxa according to the International Plant Names Index [8].

| Genus             | Species                                    | Geographical range |              | Life form      | Raw material |
|-------------------|--------------------------------------------|--------------------|--------------|----------------|--------------|
|                   |                                            | Native             | Secondary    |                |              |
| <i>Alkanna</i>    | <i>orientalis</i>                          | S Europe, W Asia   |              | per            | herba        |
|                   | <i>tinctoria</i>                           | S Europe           |              | per            | herba        |
| <i>Amblynotus</i> | <i>rupestris</i>                           | Asia C             |              | subshrub       | herba        |
| <i>Amsinckia</i>  | <i>carinata</i>                            | America N          |              | ann            | herba        |
|                   | <i>douglasiana</i>                         | America N          |              | ann            | herba        |
|                   | <i>eastwoodiae</i>                         | America N          |              | ann            | herba        |
|                   | <i>grandiflora</i>                         | America N          |              | ann            | herba        |
|                   | <i>caycina</i>                             | W, S America S     |              | ann            | herba        |
|                   | <i>lunaris</i>                             | America N          |              | ann            | herba        |
|                   | <i>lycopsoides</i>                         | America N          |              | ann            | herba        |
|                   | <i>lycopsoides</i> × <i>menziesii</i>      | America N          | Europe, Asia | ann            | herba        |
|                   | <i>var. intermedia</i>                     |                    |              |                |              |
|                   | <i>menziesii</i>                           | America N          |              | ann            | herba        |
|                   | <i>menziesii</i> var. <i>intermedia</i>    | S America N        |              | ann            | herba        |
|                   | <i>spectabilis</i> var. <i>microcarpa</i>  | America N          |              | ann            | herba        |
|                   | <i>specabtilis</i> var. <i>spectabilis</i> | America N          |              | ann            | herba        |
|                   | <i>tessellata</i>                          | America N, S       |              | ann            | herba        |
|                   | <i>tessellata</i> var. <i>gloriosa</i>     | America N          |              | ann            | herba        |
|                   | <i>tessellata</i> var. <i>tessellata</i>   | America N, S       |              | ann            | herba        |
|                   | <i>vernica</i> var. <i>furcata</i>         | America N          |              | ann            | herba        |
| <i>Anchusa</i>    | <i>arvensis</i>                            | Europe             | America N    | ann            | herba        |
|                   | <i>hispida</i>                             | Africa, Asia       |              | ann            | herba        |
|                   | <i>milleri</i>                             | Africa, Asia       |              | ann            | herba        |
|                   | <i>officinalis</i>                         | Europe, Asia       |              | per            | herba        |
|                   | <i>strigosa</i>                            | Europe, Asia       |              | per            | herba        |
| <i>Arnebia</i>    | <i>decumbens</i>                           | Europe, Asia       |              | ann            | herba        |
|                   | <i>euchroma</i>                            | Asia               |              | per            | herba        |
|                   | <i>hispidissima</i>                        | Africa, Asia       |              | ann            | herba        |
| <i>Asperugo</i>   | <i>procumbens</i>                          | Europe, Asia       | America N    | ann            | herba        |
| <i>Borago</i>     | <i>officinalis</i>                         | Europe             | America N    | ann            | herba, seeds |
|                   | <i>macranthera</i> var.                    | Asia               |              | per            | herba        |
| <i>Caccinia</i>   | <i>crassifolia</i>                         |                    |              |                |              |
| <i>Cerithe</i>    | <i>glabra</i>                              | Asia               |              | bienn          | herba        |
|                   | <i>minor</i>                               | Europe, Asia       |              | ann            | herba        |
| <i>Cordia</i>     | <i>myxa</i>                                | Asia               |              | per/tree       | herba        |
|                   | <i>sinensis</i>                            | Africa, Asia       |              | per/shrub/tree | herba        |
| <i>Cryptantha</i> | <i>cana</i>                                | America N, S       |              | ann            | herba        |

|                    |                           |                |              |                    |             |
|--------------------|---------------------------|----------------|--------------|--------------------|-------------|
| <b>Cynoglossum</b> | <i>clevelandii</i>        | America N, S   |              | ann                | herba       |
|                    | <i>confertiflora</i>      | America N, S   |              | per                | herba       |
|                    | <i>crassipes</i>          | America N, S   |              | per                | herba       |
|                    | <i>fendleri</i>           | America N, S   |              | per                | herba       |
|                    | <i>flava</i>              | America N, S   |              | per                | herba       |
|                    | <i>inequata</i>           | America N, S   |              | per                | herba       |
|                    | <i>jamesii</i>            | America N, S   |              | per                | herba       |
|                    | <i>leiocarpa</i>          | America N, S   |              | per                | herba       |
|                    | <i>thyrsiflora</i>        | America N, S   |              | per                | herba       |
|                    | <i>utahensis</i>          | America N, S   |              | per                | herba       |
|                    | <i>virgata</i>            | America N, S   |              | per                | herba       |
|                    | <i>virginiensis</i>       | America N, S   |              | per                | herba       |
|                    | <i>amabile</i>            | Asia           | America N, S | ann/bienn          | herba       |
|                    | <i>australe</i>           | Australia      | America N, S | per                | herba       |
|                    | <i>clandestinum</i>       | Europe         | America N, S | bienn              | herba       |
|                    | <i>columnae</i>           | Europe         | America N, S | ann                | herba       |
|                    | <i>creticum</i>           | Europe         | America N, S | per                | root, herba |
|                    | <i>furcatum</i>           | Asia           | America N, S | per                | herba       |
|                    | <i>germanicum</i>         | Europe, Asia   | America N, S | bienn              | herba       |
|                    | <i>glochidiatum</i>       | Europe, Asia   | America N, S | per                | herba       |
|                    | <i>lanceolatum</i>        | Africa, Asia   | America N, S | per                | herba       |
|                    | <i>latifolium</i>         | Asia           | America N, S | per                | herba       |
|                    | <i>macrostylum</i>        | Europe         | America N, S | per                | herba       |
|                    | <i>montanum</i>           | Europe, Asia   | America N, S | per                | herba       |
|                    | <i>nervosum</i>           | Europe, Asia   | America N, S | per                | herba       |
|                    | <i>officinale</i>         | Europe         | America N, S | per                | root, herba |
|                    | <i>pictum</i>             | Europe         | America N, S | per                | root, herba |
|                    | <i>viridiforum</i>        | Asia           | America N, S | per                | root, herba |
| <b>Echium</b>      | <i>amoenum</i>            | Europe, Asia   |              | bienn              | herba       |
|                    | <i>angustifolium</i>      | Europe         |              | per                | herba       |
|                    | <i>diffusum</i>           | Europe         |              | per                | herba       |
|                    | <i>glomeratum</i>         | Europe, Asia   |              | bienn              | herba       |
|                    | <i>horridum</i>           | Africa         |              | ann/per            | herba       |
|                    | <i>humile</i>             | Africa, Europe |              | per                | herba       |
|                    | <i>hypertropicum</i>      | Africa         |              | shrub              | herba       |
|                    | <i>italicum</i>           | Europe, Asia   |              | bienn              | herba       |
|                    | <i>plantagineum</i>       | Europe         |              | ann/bienn          | herba       |
|                    | <i>pininana</i>           | Europe         |              | bienn/subshr<br>ub | herba       |
|                    | <i>rauwolfii</i>          | Africa, Asia   |              | ann                | herba       |
|                    | <i>angustifolium ssp.</i> | Africa, Asia   |              | per                | herba       |
|                    | <i>sericeum</i>           |                |              |                    |             |

|                     |                                               |                            |          |                    |              |
|---------------------|-----------------------------------------------|----------------------------|----------|--------------------|--------------|
|                     | <i>simplex</i>                                | Europe                     |          | bienn/subshr<br>ub | herba        |
|                     | <i>stenosiphon</i> ssp.                       |                            |          | subshrub/shr<br>ub | herba        |
|                     | <i>stenosiphon</i>                            | Africa                     |          |                    |              |
|                     | <i>tuberculatum</i>                           | Africa, Spain              |          | bienn              | herba        |
|                     | <i>vulgare</i>                                | Europe, Asia               |          | ann/bienn          | herba        |
|                     | <i>wildpretti</i>                             | Europe                     |          | bienn/subshr<br>ub | herba        |
| <b>Ehretia</b>      | <i>aspera</i>                                 | Asia                       |          | shrub/tree         | herba        |
| <b>Euploca</b>      | <i>bracteatum</i>                             | Australia                  |          | ann                | herba        |
|                     | <i>bursiferum</i>                             | America C                  |          | ann                | herba        |
|                     | <i>ovalifolium</i>                            | N Africa, Asia             |          | ann/subshrub       | herba        |
|                     | <i>parviantrum</i>                            | C, E Australia             |          | ann                | herba        |
|                     | <i>procumbens</i>                             | S America N                |          | ann                | herba        |
|                     | <i>queretaroanum</i>                          | S America N                |          | ann                | herba        |
|                     | <i>racemosum</i>                              | S America N                |          | subshrub           | herba        |
|                     | <i>marifolia</i> ssp. <i>marifolia</i>        | S Asia                     |          | ann/subshrub       | herba        |
|                     | <i>sessei</i>                                 | S America N                |          | ann                | herba        |
|                     | <i>humilis</i>                                | S America N                |          | subshrub           | herba        |
|                     | <i>wigginsii</i>                              | S America N                |          | ann                | herba        |
| <b>Hackelia</b>     | <i>californica</i>                            | America N                  |          | per                | herba        |
|                     | <i>uncinata</i>                               | C Asia                     |          | per                | herba        |
|                     | <i>floribunda</i>                             | America N                  |          | bienn/per          | herba        |
|                     | <i>velutina</i>                               | America N                  |          | per                | herba        |
| <b>Heliotropium</b> | <i>acutiflorum</i>                            | Asia                       |          | subshrub           | herba        |
|                     | <i>amplexicaule</i>                           | America S                  |          | subshrub           | herba        |
|                     | <i>angiospermum</i>                           | America S, C, N            |          | ann/subshrub       | herba        |
|                     | <i>arbainense</i>                             | Africa, Asia               |          | subshrub           | herba        |
|                     | <i>arborescens</i>                            | America S                  |          | subshrub/shr<br>ub | herba        |
|                     | <i>arguzioides</i>                            | Europe, Asia               |          | subshrub           | herba        |
|                     | <i>bacciferum</i>                             | Africa                     |          | subshrub           | herba        |
|                     | <i>bovei</i>                                  | Europe                     |          | ann                | herba        |
|                     | <i>arboreum</i>                               | E Africa, W Australia      |          | shrub              | herba        |
|                     | <i>sibiricum</i>                              | SE Europe, Asia            |          | per                | herba        |
|                     | <i>circinatum</i>                             | Asia                       |          | ann                | herba        |
|                     | <i>confertifolium</i>                         | Asia                       |          | ann                | herba        |
|                     | <i>crassifolium</i>                           | Asia                       |          | ann                | herba        |
|                     | <i>curassavicum</i>                           | Australia, America N,<br>S | Africa N | ann/subshrub       | herba, seeds |
|                     | <i>curassavicum</i> var.<br><i>argentinum</i> | America S, Australia       | Africa N | ann/subshrub       | herba        |

|                     |                                      |                       |                                   |                |              |
|---------------------|--------------------------------------|-----------------------|-----------------------------------|----------------|--------------|
| <i>Euploca</i>      | <i>curassavicum</i> var.             | Australia, America N, | Africa N                          | ann/subshrub   | herba        |
|                     | <i>curassavicum</i>                  | S                     |                                   |                |              |
|                     | <i>dasycarpum</i>                    | Asia                  |                                   | subshrub       | root, herba  |
|                     | <i>digynum</i>                       | Africa N, Asia        |                                   | subshrub       | herba        |
|                     | <i>disciforme</i>                    | Asia                  |                                   | per            | herba        |
|                     | <i>dissitiflorum</i>                 | Asia                  |                                   | per            | herba        |
|                     | <i>elipticum</i>                     | Asia                  |                                   | per            | herba, seeds |
|                     | <i>esfandarii</i>                    | Asia                  |                                   | per            | herba        |
|                     | <i>europaeum</i>                     | Europe, Asia          |                                   | per            | herba        |
|                     | <i>floridum</i>                      | America S             |                                   | subshrub       | herba        |
|                     | <i>foliosissimum</i>                 | America N             |                                   | subshrub       | herba        |
|                     | <i>fruticosum</i>                    | America N, S          |                                   | per            | herba        |
|                     | <i>hirsutissimum</i>                 | Europe                |                                   | per            | herba        |
|                     |                                      |                       | America C,                        |                |              |
|                     | <i>indicum</i>                       | America S             | Africa C, Asia<br>SE              | per            | herba        |
|                     | <i>keralense</i>                     | Asia                  |                                   | per            | herba        |
|                     | <i>lasiocarpum</i>                   | Africa, Asia          |                                   | per            | herba        |
|                     | <i>marifolium</i>                    | Asia                  |                                   | per            | herba        |
|                     | <i>maris mortui</i>                  | Asia                  |                                   | per            | herba        |
|                     | <i>megalanthum</i>                   | America S             |                                   | subshrub/shrub | herba        |
|                     | <i>molle</i>                         | S America N           |                                   | ann            | herba        |
|                     | <i>olgae</i>                         | C Asia                |                                   | per            | root, herba  |
|                     | <i>popovii</i> ssp. <i>gillianum</i> | Asia                  |                                   | per            | seed         |
|                     | <i>ramosissimum</i>                  | NE Africa, W Asia     |                                   | subshrub       | herba        |
|                     | <i>rotundifolium</i>                 | N Africa              |                                   | subshrub       | herba        |
|                     | <i>curassavicum</i> var.             | N America N           |                                   | per            | herba        |
|                     | <i>obovatum</i>                      |                       |                                   |                |              |
|                     | <i>steudneri</i>                     |                       | S, N Africa                       | subshrub/shrub | herba        |
|                     | <i>ophiglosum</i>                    |                       | NE Africa, W Asia                 | subshrub       | herba        |
|                     | <i>suaveolens</i>                    |                       | SE, E Europe, W Asia              | ann            | herba        |
|                     | <i>zeylandicum</i>                   |                       | S Africa, S Asia                  | per            | herba        |
|                     | <i>sarmentosum</i>                   |                       | E Asia, Australia                 | shrub          | herba        |
|                     | <i>supinum</i>                       |                       | E, S, C Europe, Africa,<br>W Asia | ann            | leaf, herba  |
|                     |                                      | S America N, S        |                                   |                | root,        |
|                     | <i>humilis</i>                       | America S             |                                   | subshrub       | herba        |
|                     | S America N, S                       |                       | subshrub/shrub                    | herba          |              |
| <i>transalpinum</i> | America S                            |                       | ub                                |                |              |



|                        |                                          |                            |                          |                |             |
|------------------------|------------------------------------------|----------------------------|--------------------------|----------------|-------------|
|                        | <i>transalpinum</i> var.                 |                            |                          | subshrub/shrub | herba       |
|                        | <i>transalpinum</i>                      | America N, C               |                          | ub             |             |
|                        | <i>dasycarpum</i> ssp.                   |                            |                          |                |             |
|                        | <i>transoxanum</i>                       | C Asia                     |                          | subshrub       | herba       |
|                        | <i>intermedia</i>                        | C, E Asia                  |                          | ann            | herba       |
|                        | <i>squarrosa</i>                         | Eurasia                    | America N                | bienn          | herba       |
|                        | <i>spinocarpos</i>                       | N Africa, W Asia           |                          | ann            | herba       |
| <b>Lindelofia</b>      | <i>anchusoides</i>                       | C Asia                     |                          | per            | herba       |
|                        | <i>stylosa</i> ssp. <i>stylosa</i>       | C Asia                     |                          | per            | herba       |
|                        | <i>longiflora</i>                        | C Asia                     |                          | per            | herba       |
|                        | <i>olgae</i>                             | C Asia                     |                          | per            | herba       |
|                        | <i>stylosa</i> ssp. <i>pterocarpa</i>    | C Asia                     |                          | per            | herba       |
|                        | <i>longiflora</i> var. <i>longiflora</i> | C Asia                     |                          | per            | herba       |
|                        | <i>stylosa</i>                           | C Asia                     |                          | per            | seed        |
|                        | <i>tschimganica</i>                      | C Asia                     |                          | per            | herba       |
| <b>Lithospermum</b>    | <i>canesens</i>                          | C America N                |                          | per            | herba       |
|                        | <i>erythrorhizon</i>                     | E Asia                     |                          | per            | herba       |
|                        | <i>officinale</i>                        | Eurasia                    | E America N              | per            | herba       |
| <b>Lithodora</b>       | <i>fruticosa</i>                         | N Africa, France, Spain    |                          | subshrub       | herba       |
| <b>Moltikiopsis</b>    | <i>ciliata</i>                           | N Africa, W Asia           |                          | subshrub       | herba       |
| <b>Myosotis</b>        | <i>scorpioides</i>                       | Eurasia                    | America N                | per            | herba       |
|                        | <i>sylvatica</i>                         | Eurasia                    | America N                | per            | herba       |
| <b>Neatostema</b>      | <i>apulium</i>                           | S Europe, N Africa, W Asia |                          | ann            | herba       |
| <b>Nonea</b>           | <i>lutea</i>                             | W Asia, C Europe           |                          | ann            | herba       |
|                        | <i>setosa</i>                            | C Asia                     |                          | per            | herba       |
|                        | <i>echioides</i>                         | S Europe, W Asia           |                          | ann            | herba       |
| <b>Omphalodes</b>      | <i>verna</i>                             | S Europe                   | C, N Europe, E America N | per            | herba       |
| <b>Onosma</b>          | <i>alborosea</i>                         | W Asia                     |                          | subshrub       | herba       |
|                        | <i>arenaria</i>                          | C, SE Europe               |                          | bienn/per      | herba       |
|                        | <i>arenaria</i> ssp. <i>pennina</i>      | S Europe                   |                          | per            | herba       |
|                        | <i>erecta</i>                            | S Europe                   |                          | per/subshrub   | herba       |
|                        | <i>hetrophyllum</i>                      | S Europe                   |                          | per/subshrub   | herba       |
|                        | <i>leptantha</i>                         | S Europe                   |                          | per            | herba       |
|                        | <i>stellulata</i>                        | S Europe                   |                          | per            | herba       |
| <b>Paracaryum</b>      | <i>himalayense</i>                       | C Asia                     |                          | ann            | herba       |
| <b>Microparacaryum</b> | <i>intermedium</i>                       | ES Europe, W Asia          |                          | ann            | herba       |
|                        | <i>regulosum</i>                         | ES Europe, W Asia          |                          | bienn/per      | herba       |
| <b>Cynoglossum</b>     | <i>zeylandicum</i>                       | S Asia                     |                          | bienn          | root, herba |
| <b>Pulmonaria</b>      | <i>obscura</i>                           | Europe to W. Siberia       |                          | per            | herba       |

|             |                                             |                           |                           |                            |                      |
|-------------|---------------------------------------------|---------------------------|---------------------------|----------------------------|----------------------|
| Rindera     | austroechinata                              | C Asia                    | per                       | leaf, root,<br>herba, seed |                      |
|             | tetraspis                                   | E Europe, W Asia          | per                       | herba                      |                      |
|             | echinata                                    | C Asia                    | per                       | herba                      |                      |
|             | oblongifolia                                | C Asia                    | per                       | herba                      |                      |
|             | umbellata                                   | SE Europe                 | per                       | herba                      |                      |
| Solenanthus | circinnatus                                 | W, C Asia                 | per                       | herba, seed,<br>root       |                      |
|             | coronatus                                   | S Europe                  | per                       | herba                      |                      |
|             | karateginus                                 | C Asia                    | per                       | herba                      |                      |
|             | turkestanicus                               | W, C Asia                 | per                       | herba                      |                      |
| Symphytum   | aintabicum                                  | W Asia                    | per                       | root, herba                |                      |
|             | asperum                                     | W Asia                    | America N, N<br>Europe    | per                        | root, herba          |
|             | bohemium                                    | E. Europe to<br>Caucasus. | S, W Europe               | per                        | root, herba          |
|             | caucasium                                   | Caucasus                  | S, W Europe               | per                        | root, herba          |
|             | consolidum                                  | Europe                    |                           | per                        | root, herba          |
|             | grandiflorum                                | Europe                    | N, C America<br>S; C Asia | per                        | root, herba          |
|             | ibericum                                    | W Asia                    | W Europe                  | per                        | root, herba          |
|             | officinale                                  | Eurasia                   | America N, C,<br>S        | per                        | root, herba          |
|             | orientale                                   | SE, E. Europe, W Asia     | C Europe                  | per                        | root, herba          |
|             | officinale ssp. officinale                  | Eurasia                   | America N                 | per                        | root, herba          |
|             | sylvaticum ssp. sepulcare<br>var. sepulcare | W Asia                    |                           | per                        | root, herba          |
|             | tanaicense                                  | C, E Europe               |                           | per                        | root, herba          |
|             | tuberosum                                   | C, W Europe               |                           | per                        | root, herba          |
|             | × uplandicum                                | C Asia                    | Europe                    | per                        | root, herba          |
| Trahlenthus | hissaricus                                  | Asia                      |                           | per                        | herba                |
|             | korolkovii                                  | Asia                      |                           | per                        | herba                |
| Trichodesma | africanum                                   | Africa                    |                           | per                        | herba                |
|             | ehrenbergii                                 | Africa, Asia              |                           | ann                        | herba                |
|             | incanum                                     | Asia                      |                           | per                        | herba, seed,<br>root |
|             | zeylanicum                                  | Africa, Asia              |                           | ann                        | herba                |
| Ulugbekia   | tschimganica                                | Asia                      |                           | per                        | herba                |

**Table S3.** Dynamics of PAs occurrence in species of the family *Boraginaceae*. Group I – rare, exclusive compounds, found in 1 to 3 species; Group II – moderately frequent compounds, recognized in 4 to 9 species; Group III – frequent compounds, found in 10 to 15 species; Group IV – very frequent compounds, recognized in 16 to 20 species; Group V – common compounds, found in more than 20 species. In each group metabolites are ranked alphabetically by increasing occurrence in plants. List of the compounds was prepared according to El-Shazly and Wink [5]. Metabolites from each group ranked alphabetically by increasing occurrence in plants.

| Number and Name of PA |                                                   |    |                                                                                  |     |                                                                               |     |                                                         |
|-----------------------|---------------------------------------------------|----|----------------------------------------------------------------------------------|-----|-------------------------------------------------------------------------------|-----|---------------------------------------------------------|
| Group I               |                                                   |    |                                                                                  |     |                                                                               |     |                                                         |
| 1                     | 3'-Acetylcanesine                                 | 45 | Dihydroechinatine                                                                | 89  | (7S,8S) Petranine                                                             | 133 | Erythro-2'',3''-chloro-2''-hydroxyechiumine             |
| 2                     | 3'-Acetylcanescenine                              | 46 | Echiupine                                                                        | 90  | Pictumine                                                                     | 134 | Heliospathuline                                         |
| 3                     | 7-Acetyl-9-curassavoylheliotridine                | 47 | Echivulgarine                                                                    | 91  | Platynecine                                                                   | 135 | Heliotridine                                            |
| 4                     | 7-Acetyl-9-(2,3-dihydroxybutryl) retronecine      | 48 | Ehretinine                                                                       | 92  | Platynecine N-oxide 2S-hydroxy-2S (1S-hydroxyethyl)-4-methyl-pentanosyl ester | 136 | 9-(3'-Isovaleryl)viridiflory retronecine                |
| 5                     | 7-Acetyl-9-(2-dimethylbutryl) retronecine         | 49 | 7-Epi-echimiplate                                                                | 93  | Punctanecine                                                                  | 137 | Longitubine                                             |
| 6                     | 7-Acetylechinatine                                | 50 | 1 $\alpha$ -2 $\alpha$ -Epoxy-1 $\beta$ -hydroxymethyl-8 $\alpha$ -pyrrolizidine | 94  | Pycnanthine                                                                   | 138 | 7-(2-Methylbutyryl)retronecine                          |
| 7                     | 3'- Acetylechihumiline                            | 51 | Floridanine                                                                      | 95  | Retronecine-7:9- dibenzoate                                                   | 139 | 7-(2-Methylbutyryl)-9-(2,3-dihydroxybutyryl)retronecine |
| 8                     | 3'-Acetylechiumine                                | 52 | Floridimine                                                                      | 96  | Retronecine 2S-hydroxy-2S(1S-hydroxyethyl)-4-methyl-pentanosyl ester          | 140 | Monocrotaline                                           |
| 9                     | 3'-Acetylechimidine                               | 53 | Floridine                                                                        | 97  | Retronecine 2S-hydroxy-2S(1R-hydroxyethyl)-4-methyl-pentanosyl ester          | 141 | Neolatifoline                                           |
| 10                    | 5'-Acetylechimidine                               | 54 | Floridinine                                                                      | 98  | Scorpioidine                                                                  | 142 | 7-Senecioylhelotridine                                  |
| 11                    | 5'-Acetyleuropine                                 | 55 | Hackelidine                                                                      | 99  | 7-Senecioylrinderine                                                          | 143 | 9-Senecioylretronecine                                  |
| 12                    | 7-Acetyleuropine                                  | 56 | Helibracteatine                                                                  | 100 | 7-Senecioyllycopsamine                                                        | 144 | 7-Tigloyl-9-(2,3-dihydroxypropanoyl)retronecine         |
| 13                    | 7-Acetyl-9-(2-hydroxy-3-methylbutryl) retronecine | 57 | Helibractinecine                                                                 | 101 | Sincamidine                                                                   | 145 | 7-Tigloyllycopsamine                                    |
| 14                    | 5'-Acetylasiocarpine                              | 58 | Helibracteatinecine                                                              | 102 | Senkirkine                                                                    | 146 | Trachelanthine                                          |
| 15                    | 7-Acetyl-9-latifolylretronecine                   | 59 | Helibracteatinine                                                                | 103 | Strigosine                                                                    | 147 | Triangularine                                           |
| 16                    | 3'-Acetylolithosenine                             | 60 | Heliofoline                                                                      | 104 | Supinidine N-oxide 2S-hydroxy-2S(1S-hydroxyethyl)-4-methyl-pentanoyl ester    | 148 | Triangularicine                                         |
| 17                    | 7-Acetyl-9-(2-methylbutyryl) retronecine          | 61 | Helindicine                                                                      | 105 | Thesinine                                                                     | 149 | Viridantine                                             |
| 18                    | 7-Acetylretronecine                               | 62 | Heliocoromandaline                                                               | 106 | Thesinine-4'-O- $\beta$ -D-glucoside                                          | 150 | 3'-Acetylheliosupine                                    |
| 19                    | 7-Acetyl-9-sarracinoyl retronecine                | 63 | Heliocurassavine                                                                 | 107 | 7-Tigloyl-9-(2-deoxy-2-methyl) echimidinyheliotridin                          | 151 | 9-Acetytessellatine                                     |
| 20                    | 7-Acetylscorpioidine                              | 64 | Heliocurassavicine                                                               | 108 | 7-Tigloylheliotridine                                                         | 152 | 7-Angeloylheliotridine                                  |
| 21                    | 3'-Acetylsupinine                                 | 65 | Heliocurassavinine                                                               | 109 | 7-Trachelanthyl-laburnine                                                     | 153 | Asperumine                                              |

|    |                                                              |    |                                                                       |     |                                                  |     |                                  |
|----|--------------------------------------------------------------|----|-----------------------------------------------------------------------|-----|--------------------------------------------------|-----|----------------------------------|
| 22 | 3'-Acetyltessellatine                                        | 66 | Heliospathine                                                         | 110 | 7-Trachelanthylretronecine                       | 154 | Carategine                       |
| 23 | 3'-Acetyltrachelanthamine                                    | 67 | Heliotridine 2S-hydroxy-2S (1S-hydroxyethyl)-4-methyl-pentanoyl ester | 111 | Transalpinecine                                  | 155 | Curassavine                      |
| 24 | 9-Acetyltrachelanthamine                                     | 68 | Heliovicine                                                           | 112 | Uluganine                                        | 156 | Cynaustine                       |
| 25 | 3'-Acetylviridiflorine                                       | 69 | Heliscabine                                                           | 113 | Vulgarine                                        | 157 | 3',7-Diacetylintermediate        |
| 26 | 7-Acetylvulgarine                                            | 70 | Hydroxymyoscorpine                                                    | 114 | 3'-Acetylfurcatine                               | 158 | thero-2'',3''-Dihydroxyechiumine |
| 27 | 7 $\alpha$ -Angeloyl-1-chloromethyl-1,2-dihydropyrrolizidine | 71 | Ilamine                                                               | 115 | 3'-Acetylindicine                                | 159 | Echimiplate                      |
| 28 | 7-Angeloyl-9-(2,3-dihydroxybutyryl) heliotridine             | 72 | Indicine                                                              | 116 | 3'-Acetylmyscorpine                              | 160 | Echiuplatine                     |
| 29 | 7-Angeloyl-1-formyl-6,7-dihydro-5H-pyrrolizidine             | 73 | Isoechinatinine                                                       | 117 | 3'-Acetylinderine                                | 161 | Furcatine                        |
| 30 | 7-Angeloylechinatine                                         | 74 | Isolycopsamine                                                        | 118 | 9-(3'-Acetyl)viridiflory retronecine             | 162 | Incanine                         |
| 31 | 7-Angeloylinderine                                           | 75 | Isoretronocanol (or its isomer)                                       | 119 | 9-(3'-Acetyl)viridifloryl turnifordine           | 163 | 7-Seneciylretronecine            |
| 32 | 9-Angeloyltrachelanthamidine                                 | 76 | Lactodine                                                             | 120 | Anadoline                                        | 164 | Symlandine                       |
| 33 | 7-Angeloyl-9-(+)-trachelanthylheliotridine                   | 77 | 9-Latifolylretronecine                                                | 121 | 7-Angeloyl-9-(2,3-dihydroxypropanoyl)retronecine | 165 | Symviridine                      |
| 34 | 9-(Butyryl-2-ene) supinidine                                 | 78 | Lindelofamine                                                         | 122 | 7-Angeloyl-9-(hydroxypropenoyl) retronecine      | 166 | Trichodesmine                    |
| 35 | Canescine                                                    | 79 | Lithosenine                                                           | 123 | 7-Angeloyllycopsamine                            | 167 | Turkestanine                     |
| 36 | Canescenine                                                  | 80 | Macrophylline                                                         | 124 | 7-Angeloyl-9-(2-methylbutyryl)heliotridine       | 168 | Uplandicine                      |
| 37 | Cryptanthine                                                 | 81 | Macrotamine                                                           | 125 | 7-Angeloyl-9-(2-methylbutyryl)retronecine        |     |                                  |
| 38 | Curassanecine                                                | 82 | Megalanthonine                                                        | 126 | Coromandaline                                    |     |                                  |
| 39 | 9-Curassavorylheliotridine                                   | 83 | Methyechiuplatine                                                     | 127 | Coromandalinine                                  |     |                                  |
| 40 | Cynoglossamine                                               | 84 | 1-Methylene-8 $\alpha$ -pyrrolizidine                                 | 128 | Curassavinine                                    |     |                                  |
| 41 | Dehydroheliotrine                                            | 85 | 9-(2-Methylbutyryl) retronecine                                       | 129 | 3',7-Diacetyllycopsamine                         |     |                                  |
| 42 | 5-Deoxylasiocarpine                                          | 86 | Neocoromandaline                                                      | 130 | Dihydroxytriangularine                           |     |                                  |
| 43 | 3',9-Diacetyltessellatine                                    | 87 | Onosmerectine                                                         | 131 | Dihydroxytriangularicine                         |     |                                  |
| 44 | 5,6-Dihydro-7,9-dimethoxy-7H-pyrrolizidine                   | 88 | (7S,8R) Petranine                                                     | 132 | 2'',3''-Epoxyechiumine                           |     |                                  |

#### Number and Name of PAs

| Group II              | Group III             | Group IV                | Group V       |
|-----------------------|-----------------------|-------------------------|---------------|
| 1 3'-Acetylechinatine | 1 7-Acetyllycopsamine | 1 3'-Acetylintermediate | 1 Retronecine |

|    |                                                     |    |                       |   |                       |   |                     |
|----|-----------------------------------------------------|----|-----------------------|---|-----------------------|---|---------------------|
| 2  | 7-Angeloyl-9-(2,3-dihydroxybutyryl)ret-<br>ronecine | 2  | Echiumine             | 2 | Lasiocarpine          | 2 | 7-Acetyllycopsamine |
| 3  | Echiumine                                           | 3  | Trachelanthamine      | 3 | 7-Angeloylretronecine | 3 | Heliotrine          |
| 4  | 7-(2-Methylbutyryl)-9-<br>echimidinyl retronecine   | 4  | Symphytine            | 4 | 7-Acetylintermediate  | 4 | Echimidine          |
| 5  | 7-Tigloyl-9-(2,3-dihydroxybutyryl) ret-<br>ronecine | 5  | 3'-Acetyllycopsamine  | 5 | Amabiline             | 5 | Supinine            |
| 6  | 7-Tigloyl-9-(2-methylbutyryl)ret-<br>ronecine       | 6  | 9-Angeloylretronecine |   |                       | 6 | Echinatine          |
| 7  | 9-Angeloyl-7-<br>viridiflorylretronecine            | 7  | Europine              |   |                       | 7 | Intermedine         |
| 8  | Cynaustaline                                        | 8  | Heliosupine           |   |                       | 8 | Lycopsamine         |
| 9  | Cynaustaline                                        | 9  | Rinderine             |   |                       |   |                     |
| 10 | Echimidine isomer (tig-<br>loyl)                    | 10 | Supinidine            |   |                       |   |                     |
| 11 | Leptanthine                                         | 11 | Viridiflorine         |   |                       |   |                     |
| 15 | Subulacine                                          | 12 | Lindelofidine         |   |                       |   |                     |
| 13 | 7-Tigloylretronecine                                | 13 | Tessellatine          |   |                       |   |                     |
| 14 | 7-Viridiflorylret-<br>ronecine                      | 14 | Trachelanthamidine    |   |                       |   |                     |
| 15 | Heleurine                                           |    |                       |   |                       |   |                     |
| 16 | Indicine                                            |    |                       |   |                       |   |                     |
| 17 | Latifoline                                          |    |                       |   |                       |   |                     |
| 18 | Lindelofine                                         |    |                       |   |                       |   |                     |
| 19 | Myoscorpine                                         |    |                       |   |                       |   |                     |
| 20 | 9-Tigloylretronecine                                |    |                       |   |                       |   |                     |
| 21 | 7-Angeloylheliotridine                              |    |                       |   |                       |   |                     |

## References

- Cheng, S.; Sun, W.; Zhao, X.; Wang, P.; Zhang, W.; Zhang, S.; Chang, X.; Ye, Z. Simultaneous determination of 32 pyrrolizidine alkaloids in two traditional Chinese medicine preparations by UPLC-MS/MS. *J. Anal. Methods Chem.* **2022**, 2022, doi:10.1155/2022/7611501.
- Rizzo, S.; Celano, R.; Piccinelli, A.L.; Serio, S.; Russo, M.; Rastrelli, L. An analytical platform for the screening and identification of pyrrolizidine alkaloids in food matrices with high risk of contamination. *Food Chem.* **2023**, 406, doi:10.1016/j.foodchem.2022.135058.
- Mukhtar, M.; Saleem, M.; Nazir, M.; Riaz, N.; Shafiq, N.; Saleem, H.; Tauseef, S.; Khan, S.; Ehsan Mazhar, M.; Bakhsh Tareen, R.; et al. Identification of pyrrolizidine alkaloids and flavonoid glycosides through HR-LCMS/MS analysis, biological screening, DFT and molecular docking studies on *Heliotropium dasycarpum* Ledeb. *Arab. J. Chem.* **2023**, 16, doi:10.1016/j.arabjc.2023.104655.

- 
4. Jiao, W.; Zhu, L.; Shen, T.; Wang, L.; Li, Q.X.; Wang, C.; Wu, X.; Chen, H.; Hua, R. Simultaneous determination of 15 pyrrolizidine alkaloids and their N-oxides in weeds, soil, fresh tea leaves, and tea: exploring the pollution source of pyrrolizidine alkaloids in tea. *Food Chem.* **2024**, *434*, 137305, doi:10.1016/j.foodchem.2023.137305.
  5. El-Shazly, A.; Wink, M. Diversity of pyrrolizidine alkaloids in the Boraginaceae structures, distribution, and biological properties. *Diversity* **2014**, *6*, 188–282, doi:10.3390/d6020188.
  6. Plants of the World online; Board of Trustees of the Royal Botanic Gardens, Kew Available online: <https://powo.science.kew.org>.
  7. Culvenor, C.C.J. Tumor-Inhibitory activity of pyrrolizidine alkaloids. *J. Pharm. Sci* **1968**, *57*, 1112–1117.
  8. IPNI – The International Plant Names Index Available online: <https://www.ipni.org>.
